# Supplementary material for: De-escalation of antimicrobial treatment in neutropenic patients with severe sepsis: results from an observational study
Source: Springer Nature journal article supplement (doi:10.1007/s00134-013-3148-9), 2013-11-13
Supplement: MOESM6 [file 8122842]

| **Action** | **Deescalation (n= 44)** |
| --- | --- |
| Delay of deescalation in ICU (days) | 4 (2-5) |
| Deescalation during neutropenia period | 30 (68) |
| Deescalation regarding the initial anti-pseudomonal betalactam | 23 (52.3) |
| Number of molecules discontinued | 1 (1-2) |
| Discontinuation of combination treatment | 13 (29.5) |
| Discontinuation of treatment against Gram positive cocci | 26 (59) |
| Discontinuation of antifungal treatment | 9 (20.5) |
| Discontinuation of antiviral treatment | 4 (9.1) |
| Escalation after deescalation | 2 (4.5) |

Data are expressed as number (percentage) or as median (25th–75th percentiles). ICU: intensive care unit

**Supplementary material Table 3*:* Characteristics of de-escalation in intensive care unit**
